# Supplementary material for: Microbiota Metabolism Failure as a Risk Factor for Postoperative Complications after Aortic Prosthetics
Source: MDPI journal article supplement (doi:10.3390/biomedicines11051335), 2023-04-30
Supplement: s1 [file s1]

Table S1. Frequency of concomitant diseases in patients with aortic aneurysm/dissection included in the study (n=79)

| <b>Concomitant heart diseases</b>                                                                                                           | Patients, n | %  |
|---------------------------------------------------------------------------------------------------------------------------------------------|-------------|----|
| Heart defects                                                                                                                               | 55          | 70 |
| Multifocal atherosclerosis                                                                                                                  | 24          | 30 |
| Coronary heart disease                                                                                                                      | 20          | 25 |
| Hypertension                                                                                                                                | 57          | 72 |
| Cardiac arrhythmias: atrial fibrillation, atrial flutter, or ventricular extrasystole                                                       | 14          | 18 |
| Conduction disturbances                                                                                                                     | 4           | 5  |
| <b>Other concomitant diseases</b>                                                                                                           |             |    |
| Connective tissue dysplasia                                                                                                                 | 10          | 12 |
| Chronic kidney disease                                                                                                                      | 16          | 20 |
| Type II diabetes mellitus                                                                                                                   | 7           | 9  |
| Diseases of the gastrointestinal tract, including gastritis, duodenitis, gastroduodenitis, gastric ulcer and/or duodenal ulcer in remission | 48          | 61 |
| Obesity of any degree                                                                                                                       | 12          | 15 |
